# Supplementary material for: Myocyte-derived Tnfsf14 is a survival factor necessary for myoblast differentiation and skeletal muscle regeneration
Source: PubMed Central journal article supplement (PMC4720906; doi:10.1038/cddis.2015.375), 2015-12-31
Supplement: cddis2015375x1.pdf [file cddis2015375x1.pdf]

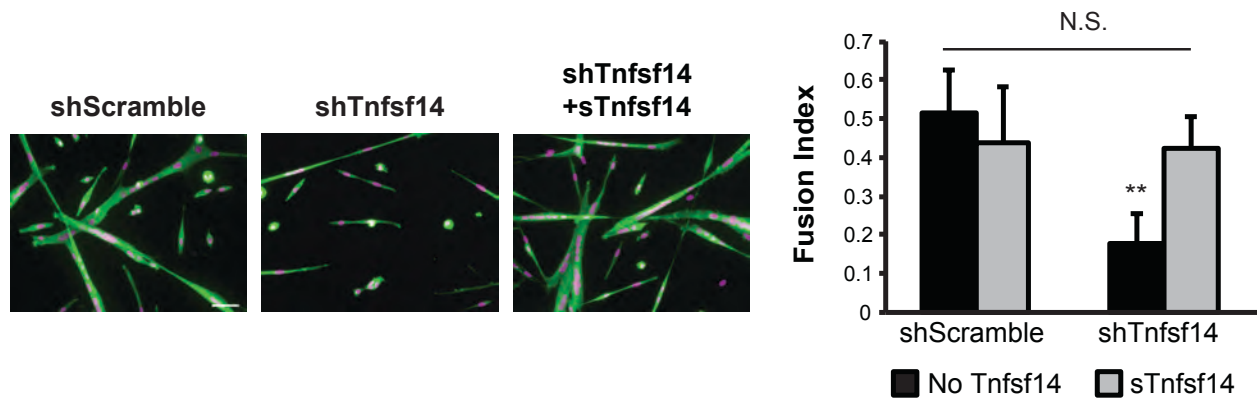

**Fig. S1. Tnfsf14 is necessary for primary myoblast differentiation**

Mouse primary myoblasts were infected with shRNA lentiviruses and differentiated for 48 hrs with or without 50 ng/mL sTnfsf14, followed by staining for MHC (green) and with DAPI (red). The fusion index was quantified (n=3). Error bars represent SD of independent replicates. Scale bar: 50  $\mu$ m.

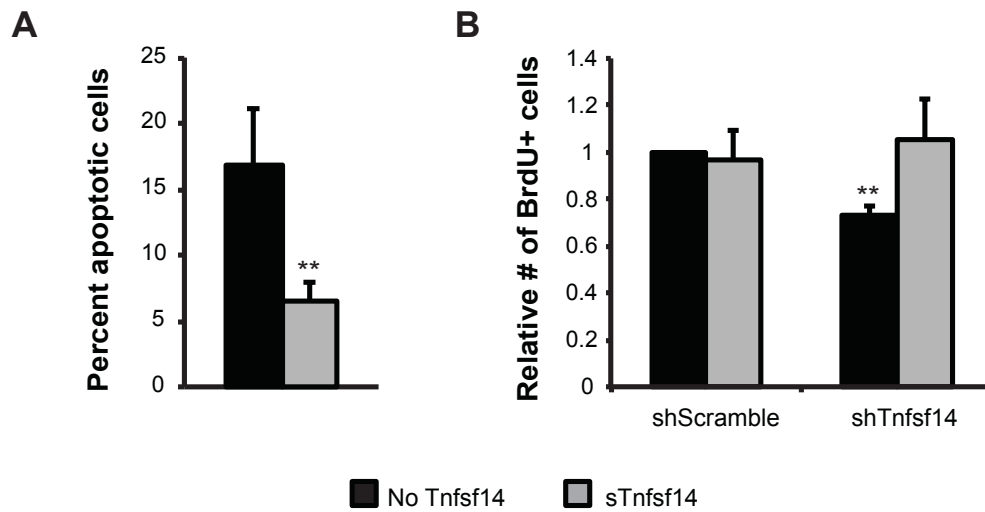

**Fig. S2. Tnfsf14 suppresses apoptosis and promotes proliferation of C2C12 cells**

(A) Proliferating C2C12 cells were exposed to 10  $\mu$ M etoposide for 24 hours in the presence or absence of 25 ng/mL recombinant sTnfsf14. TUNEL assays were performed to assess the percentage of apoptotic cells (n=5).

(B) C2C12 cells were treated as in (A) and subjected to BrdU labeling to assess cell proliferation (n=4).

All error bars represent SD of independent replicates.

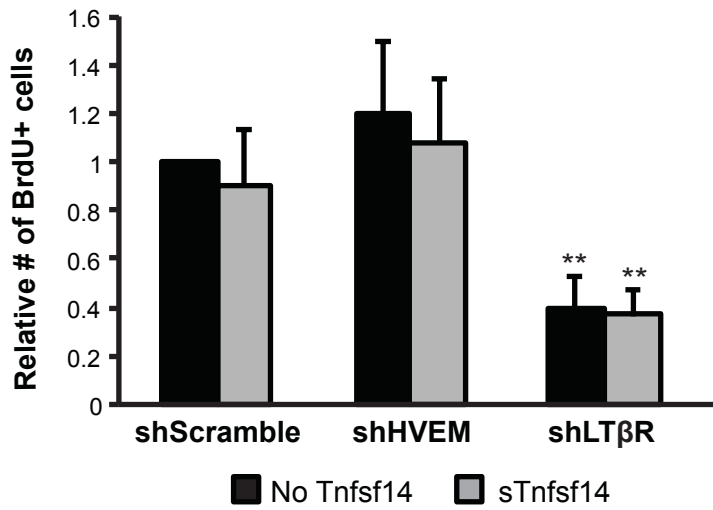

**Fig. S3. Tnfsf14 receptors in cell proliferation**

C2C12 cells were infected with shRNA lentiviruses as indicated and differentiated for 24 hrs in the presence or absence of 25 ng/mL recombinant sTnfsf14, followed by BrdU labeling to assess cell proliferation (n=4). All error bars represent SD of independent replicates.

**A**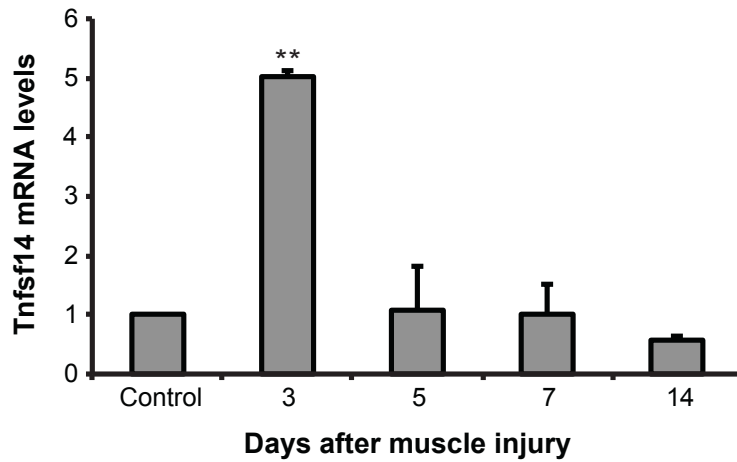**B**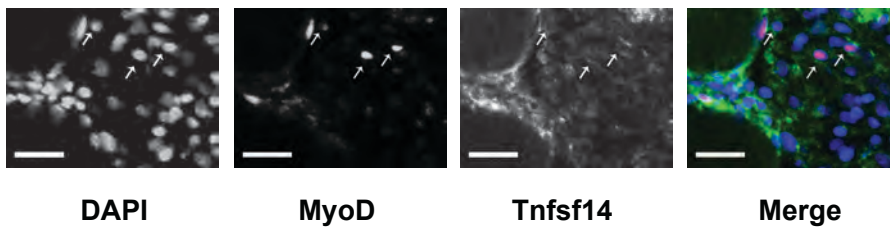**C**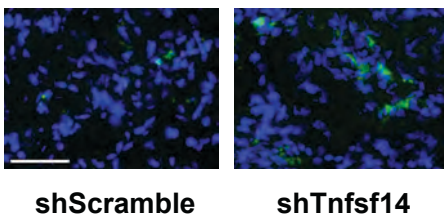**Fig. S4. Tnfsf14 expression during muscle regeneration**

(A) TA muscles were injured by BaCl<sub>2</sub> injection, and isolated on days 3, 5, 7, and 14 after injury (AI). RNA was isolated and subjected to qRT-PCR assays to measure relative levels of Tnfsf14 mRNA (n=3). Error bars represent SD of independent replicates. One-sample 2-tailed t test was performed to compare data at each time point to control. \*\* $P$ <0.01.

(B) TA muscles were injured by BaCl<sub>2</sub> injection, and isolated on day 3 after injury (AI). Upon cryosection, immunofluorescence staining for Tnfsf14 (green), MyoD (red), and DAPI (blue) was performed (n=3). Scale bar: 25  $\mu$ m. Arrows indicate some of the Tnfsf14+/MyoD+ cells.

(C) TA muscles were co-injected with BaCl<sub>2</sub> and shRNA viruses, and isolated on day 3 AI. Upon cryosection, immunofluorescence staining for cleaved PARP (green) and DAPI (blue) was performed (n=3). Scale bar: 50  $\mu$ m.
